# Supplementary material for: Modulation of TOR complex 2 signaling by the stress-activated MAPK pathway in fission yeast
Source: Oxford University Press journal article supplement (doi:10.1242/jcs.236133), 2019-09-02
Supplement: jcs236133supp.pdf [file jcs236133supp.pdf]

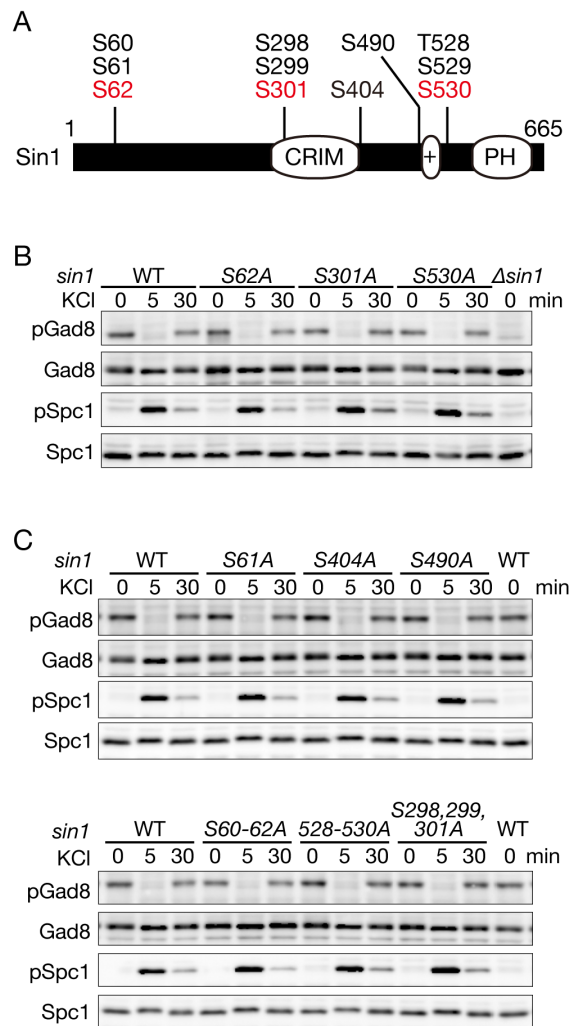

**Figure S1. Mutations to the reported phosphorylation sites in Sin1 show no apparent effect on TORC2 activity.**

**(A)** Sin1 phosphorylation sites identified by mass spectrometry (Hayashi *et al.*, 2007). Ser-62, Ser-301 and Ser-530 (in red) followed by proline are putative MAPK phosphorylation sites. "+" denotes the cluster of basic residues identified in this study (Fig. 1B).

**(B)** The putative MAPK phosphorylation sites shown in (A) were substituted by alanine, and TORC2-dependent phosphorylation of Gad8 (pGad8) and the activating phosphorylation of Spc1 MAPK (pSpc1) before and after high osmolarity stress of 0.6 M KCl were monitored by immunoblotting as in Fig. 4. S62A, *sin1*-S62A (CA10009); S301A, *sin1*-S301A (CA10017); S530A, *sin1*-S530A (CA10025); and  $\Delta sin1$  (CA9067).

**(C)** The other reported phosphorylation sites were analyzed by alanine substitutions. Upper panel: S61A, *sin1*-S61A (CA10622); S404A, *sin1*-S404A (CA11212); and S490A, *sin1*-S490A (CA10661). Lower panel: Multiple serine/threonine residues that are close to the putative MAPK phosphorylation sites were mutated. S60-62A, *sin1*-S60,61,62A (CA10630); 528-530A, *sin1*-T528A,S529A,S530A (CA11220); and S298,299,301A, *sin1*-S298,299,301A (CA10654).

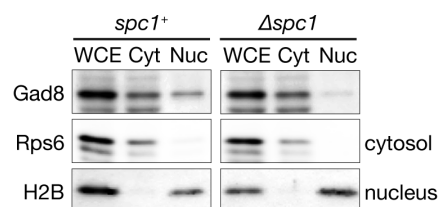

**Figure S2. Nuclear-cytoplasmic distribution of the Gad8 protein.**

The lysate of spheroplasts (whole cell extract, WCE) prepared from the wild-type and  $\Delta spc1$  strains was divided into the soluble cytosolic fraction (Cyt) and the nucleus-rich fraction (Nuc) as described by Cohen *et al.* (2016). Gad8 in each fraction was detected by immunoblotting using anti-Gad8 antibodies. The ribosomal subunit Rps6 and Histone H2B (H2B) were used as cytosolic and nuclear markers, respectively.

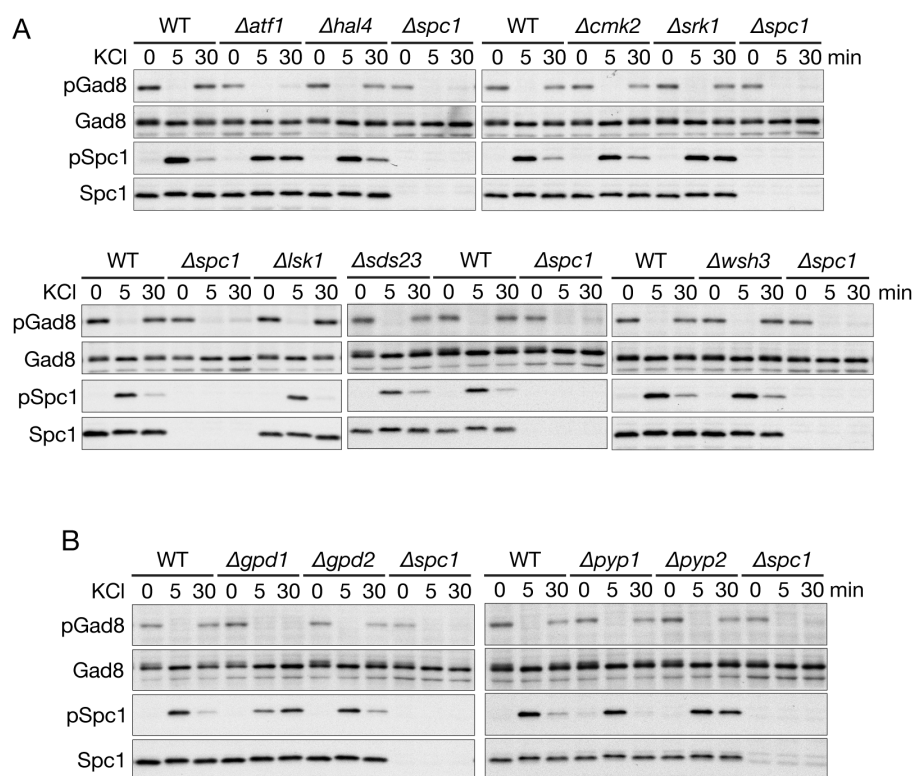

**Figure S3. A search for genes required for reactivation of TORC2 after osmstress.**  
 In the wild-type and indicated null mutant strains, TORC2-dependent phosphorylation of Gad8 (pGad8) and the activating phosphorylation of Spc1 MAPK (pSpc1) before and after high osmolarity stress of 0.6 M KCl were monitored by immunoblotting as in Fig. 4.

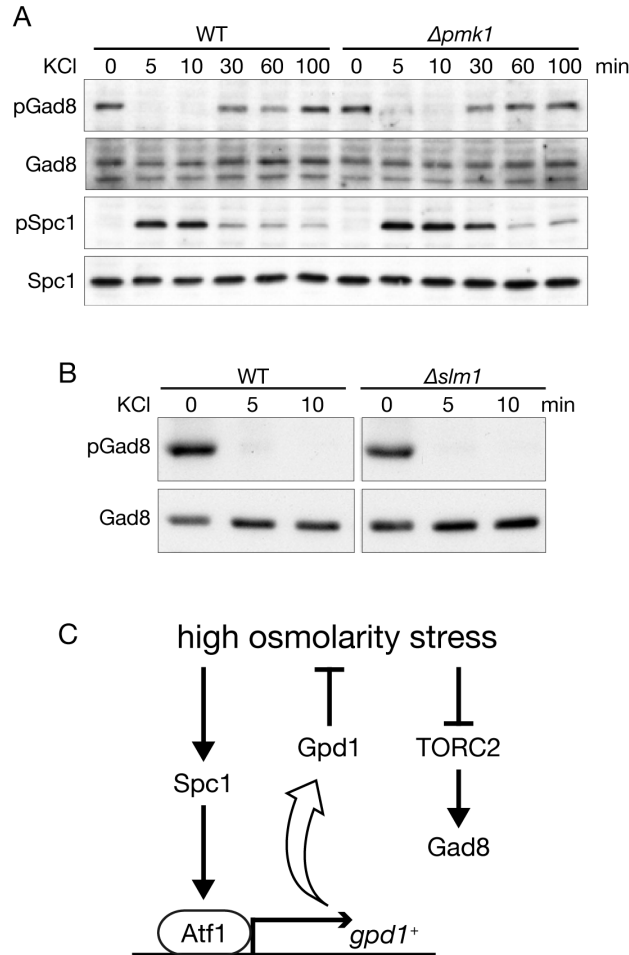

**Figure S4. Osmo-response of TORC2 signaling in fission yeast does not involve Pmk1 MAPK nor Slm1.**

(A) Pmk1 MAPK is not required for the osmo-inhibition of TORC2-Gad8 signaling. TORC2-dependent phosphorylation of Gad8 (pGad8) and the activating phosphorylation of Spc1 MAPK (pSpc1) in the wild-type and  $\Delta pmk1$  mutant strains along the time course after high osmolarity stress of 0.6 M KCl were monitored by immunoblotting as in Fig. 4. (B) Fission yeast Slm1 is not required for TORC2 activity. TORC2-dependent phosphorylation of Gad8 (pGad8) was monitored by immunoblotting in the wild type (WT) and a strain lacking the only ortholog (*slm1+*; ORF, SPAC637.13c) of budding yeast Slm1/2 before and after high osmolarity stress of 0.6 M KCl. (C) Regulation of the Spc1-Atf1 and TORC2-Gad8 pathways in response to high osmolarity stress. Activation of the Atf1 transcription factor by Spc1 MAPK induces expression of the glycerol synthesis enzyme Gpd1 that promotes cellular adaptation to high osmolarity environment, mitigating the osmo-inhibition of TORC2-Gad8 signaling. Spc1 and Atf1 also positively regulate TORC2 in the absence of osmolarity stress, but in a Gpd1-independent manner.

**Table S1. S. pombe strains used in this study**

| Strain        | Genotype                                                                 | Source or reference           |
|---------------|--------------------------------------------------------------------------|-------------------------------|
| BG3847H       | <i>sds23::kanR ura4-D18 leu1-32 ade6 h+</i>                              | Bioneer*                      |
| JP76          | <i>srk1::ura4<sup>+</sup> ura4-D18</i>                                   | Smith <i>et al.</i> , 2002    |
| KS1115        | <i>pyp2::ura4<sup>+</sup> ura4-D18</i>                                   | Shiozaki and Russell, 1995a   |
| KS1616        | <i>spc1::ura4<sup>+</sup> ura4-D18 h-</i>                                | Laboratory stock              |
| KS1366        | <i>spc1::ura4<sup>+</sup> ura4-D18</i>                                   | Laboratory stock              |
| KS1497        | <i>atf1::ura4<sup>+</sup> ura4-D18</i>                                   | Shiozaki and Russell, 1996    |
| KS1533        | <i>atf1::ura4<sup>+</sup> spc1::ura4<sup>+</sup> ura4-D18</i>            | Shiozaki and Russell, 1996    |
| KS1598        |                                                                          | Laboratory stock              |
| KS2060        | <i>cmk2::ura4<sup>+</sup> ura4-D18</i>                                   | Laboratory stock              |
| KS2079        | <i>wis1::myc(ura4<sup>+</sup>) ura4-D18</i>                              | Shiozaki <i>et al.</i> , 1998 |
| KS2080        | <i>wis1AA::myc(ura4<sup>+</sup>) ura4-D18</i>                            | Shiozaki <i>et al.</i> , 1998 |
| KS2081        | <i>wis1DD::myc(ura4<sup>+</sup>) ura4-D18</i>                            | Shiozaki <i>et al.</i> , 1998 |
| PR37          | <i>h-</i> (972)                                                          | Laboratory stock              |
| PR253         | <i>pyp1::ura4<sup>+</sup> ura4-D18</i>                                   | Shiozaki and Russell, 1995a   |
| TP319-31A     | <i>pmk1::ura4<sup>+</sup> ura4-D18</i>                                   | Toda <i>et al.</i> , 1996     |
| CA1788        | <i>hal4::ura4<sup>+</sup> ura4-D18</i>                                   | Wang <i>et al.</i> , 2005     |
| CA2527        | <i>wsh3::ura4<sup>+</sup> ura4-D18</i>                                   | Tatebe <i>et al.</i> , 2005   |
| CA4593        | <i>tor1::ura4<sup>+</sup> ura4-D18</i>                                   | Kawai <i>et al.</i> , 2001    |
| CA4776        | <i>sin1::FLAG(kanR) spc1::ura4<sup>+</sup> ura4-D18</i>                  | This study                    |
| CA5123/CA9121 | <i>sin1::FLAG(kanR)</i>                                                  | Tatebe <i>et al.</i> , 2010   |
| CA5126/NT475  | <i>sin1::kanR</i>                                                        | Ikeda <i>et al.</i> , 2008    |
| CA5764        | <i>slm1::kanR</i>                                                        | This study                    |
| CA5999        | <i>NTAP:tor1 sin1::FLAG(kanR)</i>                                        | Tatebe <i>et al.</i> , 2010   |
| CA6271        | <i>ste20::FLAG(kanR)</i>                                                 | This study                    |
| CA6287        | <i>NTAP:tor1 ste20::FLAG(kanR)</i>                                       | This study                    |
| CA6407        | <i>NTAP:tor1 wat1::FLAG(kanR)</i>                                        | Tatebe <i>et al.</i> , 2010   |
| CA6437        | <i>wat1::FLAG(kanR)</i>                                                  | Tatebe <i>et al.</i> , 2010   |
| CA6530        | <i>(hph)FLAG:tor1</i>                                                    | Hayashi <i>et al.</i> , 2007  |
| CA6655        | <i>ste20::3GFP(kanR)</i>                                                 | Tatebe <i>et al.</i> , 2010   |
| CA6743        | <i>gad8::1GFP(kanR)</i>                                                  | This study                    |
| CA6764        | <i>bit61::FLAG(kanR)</i>                                                 | Laboratory stock              |
| CA7139        | <i>ste20::FLAG(hph)</i>                                                  | This study                    |
| CA7209        | <i>ste20::FLAG(hph) bit61::myc(kanR)</i>                                 | This study                    |
| CA7813        | <i>bit61::FLAG(kanR) spc1::ura4<sup>+</sup> ura4-D18</i>                 | This study                    |
| CA8227        | <i>(hph)FLAG:tor1 spc1::ura4<sup>+</sup> ura4-D18</i>                    | This study                    |
| CA8576        | <i>sin1-3KQ</i>                                                          | This study                    |
| CA9067        | <i>sin1::ura4<sup>+</sup> ura4-D18</i>                                   | This study                    |
| CA9141        | <i>sin1-3KQ::FLAG(kanR)</i>                                              | This study                    |
| CA9538        | <i>sin1-3KQ::FLAG(kanR) spc1::ura4<sup>+</sup> ura4-D18</i>              | This study                    |
| CA9552        | <i>sin1::FLAG(kanR) spc1::ura4<sup>+</sup> ura4-D18</i>                  | This study                    |
| CA10009       | <i>sin1-S62A</i>                                                         | This study                    |
| CA10017       | <i>sin1-S301A</i>                                                        | This study                    |
| CA10025       | <i>sin1-S530A</i>                                                        | This study                    |
| CA10622       | <i>sin1-S61A</i>                                                         | This study                    |
| CA10630       | <i>sin1-S60,61,62A</i>                                                   | This study                    |
| CA10654       | <i>sin1-S298,299,301A</i>                                                | This study                    |
| CA10661       | <i>sin1-S490A</i>                                                        | This study                    |
| CA11212       | <i>sin1-S404A</i>                                                        | This study                    |
| CA11220       | <i>sin1-528-530A</i>                                                     | This study                    |
| CA13019       | <i>gpd2::kanR</i>                                                        | Bioneer*                      |
| CA13029       | <i>gpd1::ura4<sup>+</sup> ura4-D18</i>                                   | This study                    |
| CA13232       | <i>sin1ΔC::FLAG(ura4<sup>+</sup>) ura4-D18</i>                           | This study                    |
| CA13421       | <i>Isk1::kanR</i>                                                        | Bioneer*                      |
| CA13735       | <i>wat1::FLAG(kanR) spc1::ura4<sup>+</sup> ura4-D18</i>                  | This study                    |
| CA13774       | <i>ste20::FLAG(hph) spc1::ura4<sup>+</sup> ura4-D18</i>                  | This study                    |
| CA13783       | <i>ste20::FLAG(kanR) spc1::ura4<sup>+</sup> ura4-D18</i>                 | This study                    |
| CA13881       | <i>gad8::1GFP(kanR) spc1::ura4<sup>+</sup> ura4-D18</i>                  | This study                    |
| CA13883       | <i>ste20::3GFP(kanR) spc1::ura4<sup>+</sup> ura4-D18</i>                 | This study                    |
| CA13885       | <i>NTAP:tor1 sin1::FLAG(kanR) spc1::ura4<sup>+</sup> ura4-D18</i>        | This study                    |
| CA13892       | <i>NTAP:tor1 ste20::FLAG(kanR) spc1::ura4<sup>+</sup> ura4-D18</i>       | This study                    |
| CA13893       | <i>NTAP:tor1 wat1::FLAG(kanR) spc1::ura4<sup>+</sup> ura4-D18</i>        | This study                    |
| CA13966       | <i>gpd1::ura4<sup>+</sup> spc1::ura4<sup>+</sup> ura4-D18</i>            | This study                    |
| CA13970       | <i>ste20::FLAG(hph) bit61::myc(kanR) spc1::ura4<sup>+</sup> ura4-D18</i> | This study                    |

All strains are *h-leu1-32*, except for BG3847H, KS1616, PR37.

\* *S. pombe* haploid deletion mutant library

**Table S2. Primer DNAs used in this study**

| Product           | Primer name         | Sequence                                   | PCR reaction                                                   |
|-------------------|---------------------|--------------------------------------------|----------------------------------------------------------------|
| Spc1TA_1-313      | NdeI-spc1_1-22      | CTGACATATGGCAGAATTTATTCGTACAC              | Amplification of <i>spc1TA</i> fragment from +1 to +939        |
|                   | spc1_939pst1c       | TACCTGCAGTTCATCAGCAACAGGCTCATCAG           |                                                                |
| Spc1TA_2DN        | spc1_908fwd         | ATAATCCTACTAATGAGCCTGTTGCTGATG             | Site-directed mutagenesis                                      |
|                   | spc1_922rev         | CATTAGTAGGATTATGGTATGGAGCAAGATA            |                                                                |
| Spc1TA_DENQ       | spc1_DEnqfwd        | TAATCAAGTTTTTAAGTGGTCATTCCAAGATA           | Site-directed mutagenesis                                      |
|                   | spc1_Denqrev        | TTAAAACTTGATTAGCAACAGGCTCATCAGT            |                                                                |
| Spc1TAΔ299-313    | spc1_delfwd         | TAACACGTATTTGACTGGTCATTCCAA                | Site-directed mutagenesis                                      |
|                   | spc1_delrev         | TCAAATACGTAGTTATGAGCCAAAGCA                |                                                                |
| Sin1_2-565        | BamHI-sin1          | CGCGGATCCGGAATTAACAAGAGAGAAAGTTCTTT        | Amplification of <i>sin1</i> cDNA fragment from +4 to +1695    |
|                   | Sin1-565Xh          | CCGCTCGAGTTACCATACAAGAAATCTTGATAGGTATTGC   |                                                                |
| Sin1_2-523        | BamHI-sin1          | same as in "Sin1_2-565"                    | Amplification of <i>sin1</i> cDNA fragment from +4 to +1569    |
|                   | sin1_1569apa1c      | CTAGGGCCCGGACTTCCTTTTTTATCGCGTACCTTC       |                                                                |
| Sin1_2-400        | BamHI-sin1          | same as in "Sin1_2-565"                    | Amplification of <i>sin1</i> cDNA fragment from +4 to +1200    |
|                   | Sall_sin1_1200-1178 | GGGGTCGACTACTTCGATTTAAACGGGTAGGCAG         |                                                                |
| Sin1_466-665      | BmSin1-466          | GCGGGATCCGGCTATGGTGTGAACCAGGTG             | Amplification of <i>sin1</i> cDNA fragment from +1396 to +1998 |
|                   | Apal-sin1           | ATTGGGCCCTTAATTTATTTTTTAAACAGTATTCATCAGTG  |                                                                |
| Sin1_540-665      | sin1_1617bamh1      | CACGGATCCTAAGAAAGATGCACAATCTTCAACATACAATGC | Amplification of <i>sin1</i> cDNA fragment from +1618 to +1998 |
|                   | Apal-sin1           | same as in "Sin1_466-665"                  |                                                                |
| Sin1_3KQ          | sin1_kqfwd          | TCAACAGCAGGTTCCGCGATAAAAAAGGAAGT           | Site-directed mutagenesis                                      |
|                   | sin1_kqrev          | CGAACCTGCTGTTGAACAAGTCTAGAGTTGG            |                                                                |
| Sin1_RKHQ         | sin1_rkhqfwd        | TTCACGATCAACAAGGAAGTACCCAACAAT             | Site-directed mutagenesis                                      |
|                   | sin1_rkhqrev        | CTTGTTGATCGTGAACCTTCTTTTTAAACAAGT          |                                                                |
| Sin1Δ511-523      | sin1_1570xba1       | CAGTCTAGAACAACAATTGCCAACCTCCTCACC          | Amplification of <i>sin1</i> cDNA fragment from +1570 to +1998 |
|                   | Apal-sin1           | same as in "Sin1_466-665"                  |                                                                |
| Sin1              | sin1-497pst1nde1    | AGTCTGCAGCATATGTCTAGCTTGGCGTTGTCGAGTG      | Amplification of <i>sin1</i> + fragment from -497 to +2522     |
|                   | sin1+2522sma1bamh1  | TTCAGGATCCCGGAAAGAGGAAAGCGAGTTTATGGACAGTG  |                                                                |
| Sin1S62A          | sin1s62a_fwd        | TTTCTAGCGCTCCCCGATTGTCGCTAATG              | Site-directed mutagenesis                                      |
|                   | sin1s62a_rev        | GGGGAGCGCTAGAAAACGAAGTTTTAGA               |                                                                |
| Sin1_S61A         | sin161afwd          | TTTCTGCTAGCCCCCGATTGTCGCTAAT               | Site-directed mutagenesis                                      |
|                   | sin161arev          | GGGGGCTAGCAGAAAACGAAGTTTTAGA               |                                                                |
| Sin1_S60,61,62A   | sin160-62afwd       | GTTTGCGGCCGCTCCCCGATTGTCGCTAA              | Site-directed mutagenesis                                      |
|                   | sin160-62arev       | GGAGCGGCCGCAACGAAGTTTTAGAATA               |                                                                |
| Sin1_528,529,530A | sin1528-30afwd      | GCCAGCGGCCGACCACAAAATCCGTTT                | Site-directed mutagenesis                                      |
|                   | sin1528-30arev      | GGTGCGGCCGCTGGCAATTGTTGGGTACT              |                                                                |
| Sin1_S301A        | sin1s301a_fwd       | GAGCGAGGCGCCTTCAAAGCCCTTATTTG              | Site-directed mutagenesis                                      |
|                   | sin1s301a_rev       | GAAGGCGCCTCGCTCGAAGGAAAATAAATG             |                                                                |
| Sin1_S530A        | sin1s530a_fwd       | AACCAGCGCTCCACAAAATCCGTTTATG               | Site-directed mutagenesis                                      |
|                   | sin1s530a_rev       | TGTGGAGCGCTGGTTGGCAATTGTTGGGT              |                                                                |
| Sin1_S404A        | sin1s404afwd        | AACAGCTATTCGGGAAGCCAATAACAAAACGC           | Site-directed mutagenesis                                      |
|                   | sin1s404arev        | TCCGGAATAGCTGTTGGATGCTTCGATTT              |                                                                |
| Sin1_S490A        | sin1490afwd         | GTTGCCGGCGCTGATACTGTTTTACCAC               | Site-directed mutagenesis                                      |
|                   | sin1490arev         | ATCAGCGCCGGCAACTCGCAGAGTATAC               |                                                                |

**Table S3. Plasmids used in this study**

For Y2H

| Name                          | Expressed protein                     |                  |
|-------------------------------|---------------------------------------|------------------|
| <u>Bait plasmid</u>           |                                       |                  |
| pGBT8                         | GAL4 DNA-binding domain (BD)          | Laboratory stock |
| pGBT8-spc1TA                  | BD-Spc1T171A(1-349, full length)      | Laboratory stock |
| pGBT8-spc1TA_1-313            | BD-Spc1T171A(1-313)                   | This study       |
| pGBT8-spc1_1-109              | BD-Spc1(1-109)                        | This study       |
| pGBT8-spc1TA $\Delta$ 299-313 | BD-Spc1(1-298:314-349, $\Delta$ CD)   | This study       |
| pGBT8-spc1TA_2DN              | BD-Spc1T171A,D304N,D307N(1-349)       | This study       |
| pGBT8-spc1TA_DENQ             | BD-Spc1T171A,D312N,E313Q,D316N(1-349) | This study       |
| <u>Prey plasmid</u>           |                                       |                  |
| pGADGH                        | GAL4 activation domain (AD)           | Laboratory stock |
| pGADGH-sin1                   | AD-Sin1(2-665, full length)           | Laboratory stock |
| pGADGH-sin1_2-565             | AD-Sin1(2-565)                        | This study       |
| pGADGH-sin1_2-523             | AD-Sin1(2-523)                        | This study       |
| pGADGH-sin1_2-509             | AD-Sin1(2-509)                        | This study       |
| pGADGH-sin1_2-400             | AD-Sin1(2-400)                        | This study       |
| pGADGH-sin1_416-665           | AD-Sin1(416-665)                      | Laboratory stock |
| pGADGH-sin1_466-665           | AD-Sin1(466-665)                      | This study       |
| pGADGH-sin1_509-665           | AD-Sin1(509-665)                      | This study       |
| pGADGH-sin1_540-665           | AD-Sin1(540-665)                      | This study       |
| pGADGH-sin1 $\Delta$ 511-523  | AD-Sin1(2-510:524-665)                | This study       |
| pGADGH-sin1_3KQ               | AD-Sin1K513Q,K514Q,K515Q(2-665)       | This study       |
| pGADGH-sin1_RKHQ              | AD-Sin1R517H,K519Q,K520Q(2-665)       | This study       |

For construction of strains with mutated *sin1*

| Name                               | Mutation          |                  |
|------------------------------------|-------------------|------------------|
| pBSISK-sin1+                       | N/A               | This study       |
| pBSISK-sin1S62A                    | S62A              | This study       |
| pBSISK-sin1S61A                    | S61A              | This study       |
| pBSISK-sin1S60,61,62A              | S60A,S61A,A62A    | This study       |
| pBSISK-sin1 528,529,530A           | T528A,S529A,S530A | This study       |
| pGADGH-sin1S301A                   | S301A             | This study       |
| pGADGH-sin1S530A                   | S530A             | This study       |
| pGADGH-sin1_S404A                  | S404A             | This study       |
| pGADGH-sin1_S490A                  | S490A             | This study       |
| pREP1-sin1 S298A S299A S301A:12myc | S298A,S299A,S301A | Laboratory stock |
